# Supplementary material for: Pulmonary function and factors associated with current smoking among the hill tribe populations in northern Thailand: a cross-sectional study
Source: Springer Nature journal article supplement (doi:10.1186/s12889-020-09857-1), 2020-11-16
Supplement: MOESM1 [file 18590498]

Weight .....kg. Height .....cm. SBP (1) ..... mmHg  
DBP (2) ..... mmHg Heart Rate..... beat/min

**Part 1 Demographic data**

1.1 Gender  male  female

1.2 Age ..... years

1.3 Did you have the Thai ID card?  Yes  No

1.4 Tribe

Akah  Lahu  Hmong  Yao  Lisu  Karen

1.5 Marital status

Single  Married  Widow  Divorce

1.6 Religion

Buddhism  Christian  Muslim

1.7 Education

Uneducated  Primary education  Secondary education  
 High vocational  University

1.8 Annual family Income (bath)

<10,000 bath  10,001 - 50,000 bath  50,001 - 100,000 bath  
 >100,001 bath

1.9 Number of family members .....

1.10 Right to access medical services

No  Universal coverage scheme  Government or State Enterprise Officer  
 Social Security Scheme  Private Health Insurance

1.11 Occupation

Unemployed  Merchant  Employee  Agriculturalist

**Part 2 Smoking behavior**

2.1 Have you ever smoked?

No  
 Ever, I had been smoked for ..... years and now quitted for ..... years  
 Yes, I am smoker and have smoked for ..... years

2.2 How often have you smoked?

Everyday ..... piece/day  Someday with ..... piece/day  Seldom

2.3 What is the best category you are currently?

Non-smoker  Quitted smokers  Socialized smoking  Current smokers  Not sure

2.4 How old were you when you first smoked a cigarette?

2

2.5 Please provide the reasons of smoking

- For relaxation  Persuade by friends  Eager to do  Imitate the movie  Follow the family member  From the advertisement  Smoke during drinking  From an amusement centre  Fashionable

2.6 Which types of cigarette do you smoke?

- Commercial cigarette  Traditional tobacco  Electronic cigarette  Baragu  Other  
.....

2.7 When was the recent time you had smoked a cigarette?

- Today  Yesterday  2-7 days prior  One 1 week to 1 month prior  1-6 months ago  > 6 months to 1 year ago  > 1 year ago

2.8 Last week, how many piece of cigarette do you smoke per day?

- Not smoke  < 1 piece  piece/day  2-5 pieces/day  6-10 pieces/day  11 -20 pieces/day  >20 pieces/day

2.9 Do you have a family member smoked?

- No  
 Yes ( Father  Mother  Brother/sister  Younger sister/brother  Uncle  Aunt)

2.10 Do you have friends who smoke smoking?

- No  Yes, .... person (s)

2.11 Where you often buy a cigarette?

- Family mart  Village grocery  Outside of their village

2.12 Have you ever though to quite smoking?

- Yes  No

2.13 How much do you want to quit smoking?

- No, I did not  Rarely  Yes

2.14 Have you even been quit smoking?

- Yes  No

2.15 How do you plan to quit smoking ?

- I plan to quit smoking in the next 1 month  
 I plan to quit smoking in the next 6 months  
 I have no plan quit smoking.  
 I have already quitted smoking.

2.16 Do you feel bad on having smoking?

- Very much  Little  Never

2.17 How much money do you use for buying a cigarette per day?.....baht

2.18 Within the month, have you use your own money to buy a cigarette?

No  Yes

2.19 How difficult to get a cigarette when you need it?

Very difficult  Little  Easy

2.20 Have you ever smoked in indoor?

Yes  No

2.21 Within the last 7 days, how often of your family members had smoked indoor?

No  1-2 times  3-6 times  Everyday

2.22 If anyone starts to smoke, is it difficult to quite in your idea?

Difficult  Some difficult  Easy

2.23 During 30 days prior, how often did you observed the warning labeled on the cigarette packages?

No.  Sometimes  Very often

2.24 Regarding the warning labeled on the cigarette package, how often do you concern on the harms?

No  Little  Yes

2.25 Cigarette package labeled, is it valid in your idea?

No  Some  Yes

2.26 Did you think the warning labeled on cigarette packages, it is persuaded the same age of you do not to start use it?

No  Little  Yes

2.27 Have you had a family member who aged 0-6 years?

Yes  No

2.28 Have you had a family member who aged 7-15 years?

Yes  No

2.29 Have you had a family member who aged 60 years and over ?

Yes  No

2.30 Have you had a family member who were diagnosed as lung diseases or asthma?

Yes  No

2.31 Have you had a family member who were diagnosed as the cancer?

Yes  No

### Part 3 Substances use behaviors

3.1 Have you ever drank alcohol?

Yes, it takes for.....year  Ever, it took for.....years  No

3.2 Have you ever took amphetamine?

Yes, it takes for.....year  Ever, it took for.....years  No

3.3 Have you ever took heroine?

Yes, it takes for.....year  Ever, it took for.....years  No

3.4 Have you ever used an opium?

Yes, it takes for.....year     Ever, it took for.....years     No

3.5 Have you ever used a marijuana?

Yes, it takes for.....year     Ever, it took for.....years     No

#### Part 4. Knowledge and attitude according to harms of smoking

##### 4.1 Knowledge according to harms of smoking

| Items                                                                               | Correct | Incorrect | Not sure |
|-------------------------------------------------------------------------------------|---------|-----------|----------|
| 1. Smoking causes the lung disease.                                                 |         |           |          |
| 2. Smoking experience causes the tobacco addiction in later                         |         |           |          |
| 3. Filtered tobacco can reduce the harms than of non-filtered cigarette.            |         |           |          |
| 4. Smoking during pregnancy is not risk of the abortion.                            |         |           |          |
| 5. Smoking effects health of the others.                                            |         |           |          |
| 6. Asthmatic or allergic patients can be easily exacerbated by the cigarette smoke. |         |           |          |
| 7. Smoking effects to the brain function.                                           |         |           |          |
| 8. Regular smoking can develop lung cancer.                                         |         |           |          |
| 9. Smoking indoor could impact family members.                                      |         |           |          |
| 10. Cigarette reduce reproductive functions.                                        |         |           |          |

##### 4.2 Attitude according to harms of smoking.

| ประเด็น                                                 | Agree | Disagree | Not sure |
|---------------------------------------------------------|-------|----------|----------|
| 1. Smoking is the way of relaxation.                    |       |          |          |
| 2. We can smoke in a public area.                       |       |          |          |
| 3. Smoking is terrible.                                 |       |          |          |
| 4. Drinking alcohol must smoke                          |       |          |          |
| 5. If you have a lung problem, you should stop smoking. |       |          |          |
| 6. Smoke is not harmful for other people.               |       |          |          |
| 7. Most components in cigarette are not harmful.        |       |          |          |
| 8. Smoking can reduce weight.                           |       |          |          |
| 9. Cigarette is less harms than other substances.       |       |          |          |
| 10. Male smoking is common.                             |       |          |          |

**Part 5 Pulmonary capacities**

| <b>Testing</b>            | <b>Testing</b> |                |                | <b>Best test</b> | <b>Predicted value</b> |
|---------------------------|----------------|----------------|----------------|------------------|------------------------|
|                           | <b>Trial 1</b> | <b>Trial 2</b> | <b>Trial 3</b> |                  |                        |
| FVC (L)                   |                |                |                |                  |                        |
| FEV <sub>1</sub> (L)      |                |                |                |                  |                        |
| FEV <sub>1</sub> /FVC (%) |                |                |                |                  |                        |
| SPO <sub>2</sub> (%)      |                |                |                |                  |                        |
